# Supplementary material for: Positive Effects of Tomato Paste on Vascular Function After a Fat Meal in Male Healthy Subjects
Source: PubMed Central journal article supplement (PMC6163719; doi:10.3390/nu10091310), 2018-09-15
Supplement: nutrients-10-01310-s001.pdf [file nutrients-10-01310-s001.pdf]

## Supplementary Materials: Positive effects of Tomato Paste on vascular function after a Fat Meal in Healthy Subjects.

Andrea Dalbeni <sup>1,\*</sup>, Davide Treggiari <sup>2</sup>, Angela Tagetti <sup>1</sup>, Michele Bevilaqua <sup>1</sup>, Sara Bonafini <sup>1</sup>, Martina Montagnana <sup>3</sup>, Giuliana Scaturro <sup>1</sup>, Pietro Minuz <sup>1</sup> and Cristiano Fava<sup>1</sup>

**Table S1.** Effect (at 2 and 3.5 hours) of a fat meal ± tomato paste (FM±TP) on BP, vascular exams and metabolic parameters in healthy, young men.

| Variable at baseline                             | LFD&TP+FM<br>(2h) | LFD-only+FM<br>(2h) | Difference                                      | P-value                                     | LFD&TP+FM<br>(3.5h) | LFD-only+FM<br>(3.5h) | Difference                                        | P-value                                          |
|--------------------------------------------------|-------------------|---------------------|-------------------------------------------------|---------------------------------------------|---------------------|-----------------------|---------------------------------------------------|--------------------------------------------------|
|                                                  |                   |                     | LFD&TP+FM<br>(2h)<br>vs.<br>LFD-only+FM<br>(2h) | LFD&TP+FM<br>(2h)<br>vs.<br>LF-only+FM (2h) |                     |                       | LFD&TP+FM<br>(3.5h)<br>vs.<br>LFD-only+FM<br>(2h) | LFD&TP+FM<br>(3.5h)<br>vs.<br>LFD-nly+FM<br>(2h) |
| SBP (mmHg)                                       | 121.9 ± 6.6       | 122.4±8.8           | -0.4±9.0                                        | 0.84                                        | 121.2±8.9           | 121.0±9.6             | 0.2±9.3                                           | 0.92                                             |
| DBP (mmHg)                                       | 70.7 ±6.8         | 71.8±6.8            | -1.2±5.8                                        | 0.39                                        | 72.9±8.5            | 70.9±7.2              | 2.1±8.0                                           | 0.28                                             |
| HR (bpm)                                         | 68.2±9.2          | 68.6±11.4           | -0.4±6.9                                        | 0.80                                        | 66.4±11.2           | 64.4±9.3              | 2.0±8.4                                           | 0.31                                             |
| Brachial artery diameter<br>(mm)                 | 4.2±0.4           | 4.1±0.4             | 0.1±0.4                                         | 0.39                                        | 4.1±0.7             | 4.1±0.4               | -0.0±0.6                                          | 0.84                                             |
| FMD (%)                                          | 4.2±2.6           | 3.4±2.7             | 0.8±3.1                                         | 0.27                                        | 4.1±2.0             | 4.5±3.5               | -0.4±3.7                                          | 0.67                                             |
| NMD (%)                                          | 4.1±2.2           | 3.4±2.2             | 0.6±3.2                                         | 0.58                                        | n.p.                | n.p.                  | n.p.                                              | n.p.                                             |
| Carotid DC (KPa <sup>-1</sup> 10 <sup>-3</sup> ) | 36.2±5.3          | 38.8±7.0            | -2.6±6.1                                        | 0.08                                        | 37.1±4.9            | 37.5±7.1              | -0.4±7.1                                          | 0.75                                             |
| SI (m/sec)                                       | 6.4±0.6           | 6.5±0.8             | -0.1±0.6                                        | 0.52                                        | 6.4±0.6             | 6.7±0.7               | -0.2±0.8                                          | 0.20                                             |
| RI (%)                                           | 60.6±10.9         | 61.4±12.1           | 0.9±11.3                                        | 0.76                                        | 66.0±11.6           | 66.7±10.9             | -0.7±10.8                                         | 0.76                                             |
| Total cholesterol (mg/dL)                        | 151.2±25.4        | 148.3±28.3          | 2.8±18.3                                        | 0.51                                        | 152.5±25.5          | 147.8±25.2            | 4.6±15.8                                          | 0.21                                             |
| HDL-cholesterol (mmol/L)                         | 49.0±14.2         | 48.3±12.9           | 0.7±5.1                                         | 0.54                                        | 48.1±14.5           | 47.2±14.0             | 0.9±3.8                                           | 0.33                                             |
| LDL-cholesterol (mmol/L)                         | 74.5±24.7         | 73.3±26.9           | 1.1±13.2                                        | 0.71                                        | 77.2±24.9           | 74.1±23.2             | 3.1±10.4                                          | 0.21                                             |
| Triglycerides (mmol/L)                           | 151.0±59.3        | 140.9±49.8          | 10.2±45.4                                       | 0.34                                        | 144.1±64.5          | 138.3±69.4            | 5.8±39.3                                          | 0.52                                             |
| Glucose (mmol/L)                                 | 92.8±21           | 95.7±12.4           | -2.9±22.1                                       | 0.57                                        | 88.6±8.4            | 91.0±6.5              | -2.4±9.4                                          | 0.27                                             |

FM, Fat Meal; TP, Tomato Paste; SBP, Systolic Blood Pressure; DBP, Diastolic Blood Pressure; HR, Heart Rate; FMD, Flow Mediated Dilatation; NMD, nitroglycerin mediated dilatation; DC, distensibility; SI, Stiffness Index; RI, Reflection Index, HDL, High density Lipoproteins; LDL, Low density Lipoproteins; n.p., not performed.
